# Specific residues in the Pbx homeodomain differentially modulate the DNA-binding activity of Hox and Engrailed proteins

Lucy T. C. Peltenburg\* and Cornelis Murre†

Department of Biology, 0366, University of California, San Diego, La Jolla, CA 92093, USA

\*Present address: Department of Clinical Oncology, University Hospital Leiden, The Netherlands

†Author for correspondence (e-mail: murre@jeeves.ucsd.edu)

## SUMMARY

Two classes of homeodomain proteins, Hox and Engrailed, have been shown to act in concert with the atypical homeodomain proteins Pbx and extradenticle. We now show that specific residues located within the Pbx homeodomain are essential for cooperative DNA binding with Hox and Engrailed gene products. Within the N-terminal region of the Pbx homeodomain, we have identified a residue that is required for cooperative DNA binding with three Hox gene products but not for cooperativity with Engrailed-2 (En-2). Furthermore, there are similarities between heterodimeric interactions involving the yeast mating type proteins MAT $\alpha$ 1 and MAT $\alpha$ 2 and those that allow the formation of Pbx/Hox and Pbx/En-2 heterodimers. Specifically, residues located in the  $\alpha$ 1 homeodomain that were previously shown to form a hydrophobic pocket allowing the  $\alpha$ 2 C-terminal tail to bind, are also required for Pbx/Hox and Pbx/En-2 cooperativity.

Furthermore, we show that three residues located in the turn between helix 1 and helix 2, characteristic of many atypical homeodomain proteins, are required for cooperative DNA binding involving both Hox and En-2. Replacement of the three residues located in the turn between helix 1 and helix 2 of the Pbx homeodomain with those of the atypical homeodomain proteins controlling cell fate in the basidiomycete *Ustilago maydis*, bE5 and bE6, allows cooperative DNA binding with three Hox members but abolishes interactions with En-2. The data suggest that the molecular mechanism of homeodomain protein interactions that control cell fate in *Saccharomyces cerevisiae* and in the basidiomycetes may well be conserved in part in multicellular organisms.

Key words: cooperative DNA binding, Engrailed, homeodomain proteins, Hox, Pbx

## INTRODUCTION

Homeodomain proteins play key roles in controlling cell fate and morphogenesis. In a number of regulatory networks, homeodomain interactions have been shown to enhance the DNA-binding affinity and specificity of relatively non-specific DNA-binding proteins. In *Saccharomyces cerevisiae* such cooperative interactions have been described in great detail (Johnson, 1992). Three cell types exist for *S. cerevisiae*,  $\alpha$  cells,  $a/\alpha$  cells and  $a$  cells. The  $a$  and  $\alpha$  cells are haploid, whereas the  $a/\alpha$  cell is diploid. In diploid cells, repression of haploid-specific genes is mediated by two homeodomain proteins, designated MAT $\alpha$ 1 and MAT $\alpha$ 2.  $\alpha$ 1 and  $\alpha$ 2 are both homeodomain proteins that bind to DNA as cooperative heterodimers. This cooperativity enhances both the affinity and specificity of the heterodimeric complex as compared to  $\alpha$ 1 and  $\alpha$ 2 alone (Goutte and Johnson, 1993). The interaction between  $\alpha$ 1 and  $\alpha$ 2 involves two domains. An unstructured peptide located immediately C-terminal to the  $\alpha$ 2 homeodomain interacts with residues present in the  $\alpha$ 1 homeodomain (Vershon and Johnson, 1993). Specific residues present in the turn between helix 2 and helix 3 present on  $\alpha$ 1 are required for  $\alpha$ 1/ $\alpha$ 2 cooperativity (Stark and Johnson, 1994).

In *Drosophila* and vertebrates, similar homeodomain protein interactions have been described. Morphogenesis in *Drosophila*

is in part controlled by a family of proteins, designated as the homeotic selector proteins. The homeotic proteins are sequence-specific DNA-binding proteins that contain a region of homology, named the homeodomain (Laughon and Scott, 1984; McGinnis et al., 1984). In mammals, a class of closely related genes are present, the Hox genes, whose products are similarly involved in morphogenesis (Duboule and Dollé, 1989; Wilkinson et al., 1989; Krumlauf, 1994; Lawrence and Morata, 1994). Many *Drosophila* and vertebrate Hox gene products act in concert with another class of homeodomain proteins, extradenticle (exd) and its three mammalian homologues, Pbx1, Pbx2 and Pbx3 (Peifer and Wieschaus, 1990; Chan et al., 1994; van Dijk and Murre, 1994). exd and the Pbx gene products are closely related in their amino acids sequence and have similar biochemical properties (Flegel et al., 1993; Rauskolb et al., 1993). They belong to a class of homeodomain proteins that is referred to as atypical homeodomain proteins (Bürglin, 1994). The atypical homeodomain proteins are distinct from other homeodomain proteins in that their homeodomains contain extra amino acids, often a three amino acid insertion located in the turn between helix 1 and helix 2 (Bürglin, 1994). Other members of the atypical homeodomain proteins include a family of proteins, bE, which are involved in controlling cell fate in a number of fungi, including *Ustilago maydis*, *Coprinus cinereus* and *Schizophyllum commune* (Banuett, 1992).

Both *exd* and *Pbx* have the ability to modulate the DNA-binding activity of the Hox proteins (Chan et al., 1994; van Dijk and Murre, 1994; Chang et al., 1995; Johnson et al., 1995; Lu et al., 1995; Phelan et al., 1995; van Dijk et al., 1995). The cooperative DNA binding of Hox and *Pbx* proteins results in heterodimeric complexes that show increased DNA-binding affinity and specificity, similar to described for  $\alpha 1$  and  $\alpha 2$  (Goutte and Johnson, 1993). In addition, *Pbx* gene products also modulate the DNA-binding activity of both *Drosophila* *Engrailed* and mammalian *Engrailed-2* (*En-2*) (van Dijk and Murre, 1994; van Dijk et al., 1995; Peltenburg and Murre, 1996). The *Pbx/En-2* complexes prefer different binding sites, as compared to *Pbx/Hox* heterodimers (van Dijk and Murre, 1994; van Dijk et al., 1995).

The requirements for Hox and *Engrailed* cooperativity with the *Pbx* members have been well documented. A conserved hexapeptide located immediately N-terminal of the Hox homeodomain has been shown to be required for cooperative DNA binding (Chang et al., 1995; Knoepfler and Kamps, 1995; Neuteboom et al., 1995; Phelan et al., 1995). In *Engrailed*, a similar domain, EH2, which is closely related to the hexapeptide, is required for interaction with *exd* and the *Pbx* gene products (Peltenburg and Murre, 1996). Both the *Engrailed* and Hox homeodomain themselves are important for cooperativity, since chimeric proteins containing either the Hox hexapeptide or the EH2 domain when grafted onto a heterologous DNA-binding domain do not show cooperative DNA binding (Neuteboom et al., 1995; Peltenburg and Murre, 1996).

The structural determinants of *Pbx* for cooperative DNA binding with the Hox gene products have also been examined (Chang et al., 1995; Lu and Kamps, 1996). Residues located within the *Pbx* homeodomain and a region immediately C-terminal of the homeodomain are required for cooperativity with the Hox proteins (Chang et al., 1995; Lu and Kamps, 1996). Here we demonstrate that the *Pbx* homeodomain is required for cooperative DNA binding with both Hox and *En-2* proteins. In addition, we show that distinct residues located within the *Pbx* homeodomain are required for cooperative DNA binding with either Hox or *En-2*. Substitutions of specific residues previously shown to be involved in contacts between  $\alpha 1$  and  $\alpha 2$  are required for cooperativity involving Hox and *En-2*. Substitution of *Pbx* residues located in the turn separating helix 1 and helix 2 for amino acids located in the same position in *bE*, a protein controlling cell fate in the fungus *Ustilago maydis*, conserves the cooperativity with Hox, but abolishes cooperative DNA binding with *En-2*. The data suggest that the molecular mechanism underlying cooperative DNA binding between two homeodomain proteins may in part be conserved throughout evolution.

## MATERIALS AND METHODS

### Plasmids

The full-length *Pbx1* protein was in vitro transcribed and translated from a derivative of pSP64 containing the full-length cDNA (Peltenburg and Murre, 1996). *Pbx* 23-430 and 51-430 were constructed by inserting the *ApaI*-digested appropriate PCR products in the full-length *Pbx1* vector with *ApaI* and blunt *NcoI* ends. PCR products spanning *Pbx* 80-430, 119-430 and 172-430 were cloned into the *EcoRV* site of pSP64-ATG (van Dijk and Murre, 1994). To construct *Pbx* 1-320, the big *NcoI* fragment of the full-length *Pbx1* construct was cloned in pSS, which contains three out-of-frame stop codons

(Neuteboom et al., 1995). Similarly, a partial *PvuII* fragment was used for *Pbx* 1-309 and a partial *SspI* fragment for *Pbx* 1-304. The C-terminal deletion construct *Pbx* 1-297 contains a PCR fragment spanning the N terminus down to the C-terminal end of the homeodomain (amino acid 297), cloned in pSS (Neuteboom et al., 1995).

Deletion construct *Pbx* 105-309 consists of a *Pbx1* internal *PvuII* fragment cloned in the *EcoRV* site of pSS. To equip the three smallest combined deletions with an extra methionine, which is necessary to visualize the labeled protein on SDS-PAGE gels, PCR products starting at the 5' end of the homeodomain of templates *Pbx* 1-309, 1-304 and 1-297 were cloned in pSS-Flag, which encodes an N-terminal Flag tag (Peltenburg and Murre, 1996).

To exchange the *Pbx1* homeodomain for the *Hoxb-8* homeodomain in *Pbx/b-8/Pbx*, we generated hybrid fragments generated by PCR with oligonucleotides spanning the junctions and cloned them into the backbone of the *Pbx1* full-length plasmid. The used *Hoxb-8* translation construct was described in van Dijk et al. (1995). All mutant *Pbx1* constructs were generated by two-step PCR. For these, oligonucleotides spanning each strand of the desired mutation(s) were used in the first round of PCR, followed by combination of the products and subsequent PCR with two distal primers. In all cases, cloned PCR inserts were verified by DNA sequencing.

### In vitro translation and electrophoretic mobility shift assays (EMSA)

All proteins used in these experiments were synthesized using the SP6 TNT rabbit reticulocyte lysate-coupled transcription/translation system (Promega, Madison, WI). EMSAs were performed as described (van Dijk and Murre, 1994). Incubations and electrophoresis were done at room temperature. Reactions were adjusted to contain equal amounts of reticulocyte lysate. 1-2  $\mu$ l of each translated protein, to a maximum of 4  $\mu$ l, were used per reaction.

The <sup>32</sup>P end-labeled probes were 5'-GAGATGATTTACTT-TAGTC-3' and 5'-GTCAATTAATGCGCATCAATCAATTTTCG-3' to detect Hox-*Pbx* cooperative binding, and 5'-GTCAATTAAT-GATCAATCAATTTTCG-3' for *Engrailed-Pbx* complexes.

## RESULTS

### The *Pbx1* N-terminal region contributes to cooperative DNA binding with Hox and *Engrailed* proteins

To determine the role of the N-terminal region of *Pbx1* in allowing cooperative DNA binding with Hox and *En-2*, a series of N-terminal deletion constructs were designed and analyzed for cooperative DNA binding (Fig. 1A). The constructs were in vitro transcribed and translated using reticulocyte lysate and analyzed by SDS-polyacrylamide gel electrophoresis (Fig. 1B). The various products were next analyzed for DNA binding in the presence or absence of in vitro translated *Hoxb-7* by electrophoretic mobility shift assays (EMSA). As a probe, we used an optimal binding site for *Pbx1/Hoxb-8* heterodimers identified by binding site selection (S. T. C. Neuteboom and C. M., unpublished data). Incubation of the *Pbx1* N-terminal deletion proteins by themselves did not show any detectable specific shifted complexes (Fig. 1C, lanes 2-8). Upon addition of *Hoxb-7*, most truncated *Pbx* proteins bind efficiently to the DNA probe (Fig. 1C, lanes 10-16). N-terminal deletion of 50 amino acids results in a five-fold decrease (Fig. 1C, lanes 10-13) and DNA binding drops to almost undetectable levels upon deletion of 118 amino acids (Fig. 1C, lane 14). Further truncation leads to a partial restoration of the *Hoxb-7/Pbx1* DNA binding (Fig. 1C, lanes 15 and 16), suggesting the presence of an inhibitory domain in the N-terminal region. Similar results were obtained

with Hoxb-8 and Hoxc-6 proteins (unpublished data). The truncated proteins were also tested for cooperative DNA binding with murine En-2. As a probe, we used a binding site that previously was shown to allow cooperativity involving Pbx1 and either *Drosophila* Engrailed or murine En-2 (van Dijk and Murre, 1994; van Dijk et al., 1995). DNA binding of truncated forms of Pbx or En-2 by themselves is barely detectable (Fig. 1D, lanes 2-9). However, cooperative binding is readily detectable when both Pbx1 and En-2 are present (Fig. 1D, lanes 10-16). Cooperative DNA binding is not influenced by deletion of the N-terminal 79 amino acids (Fig. 1D, lanes 10-13), but decreases dramatically upon removal of an additional 40 amino acids (Fig. 1D, lane 14). Further deletion

restores cooperative DNA binding to levels characteristic of the full-length protein (Fig. 1D, lanes 15 and 16), again suggesting the presence of an inhibitory activity in the medial N-terminal region. These experiments show that the distal N-terminal domain is required for full cooperativity with Hox proteins, but not for cooperativity involving En-2. Deletion of an inhibitory region partly restores cooperative DNA binding with Hoxb-7 and almost completely restores the cooperativity with En-2.

**The distal carboxy terminus of Pbx1 is not required for cooperative DNA binding with Hoxb-7 and En-2**

To assess the role of the C-terminal flanking regions of Pbx1 for cooperativity with Hox and Engrailed proteins, four con-

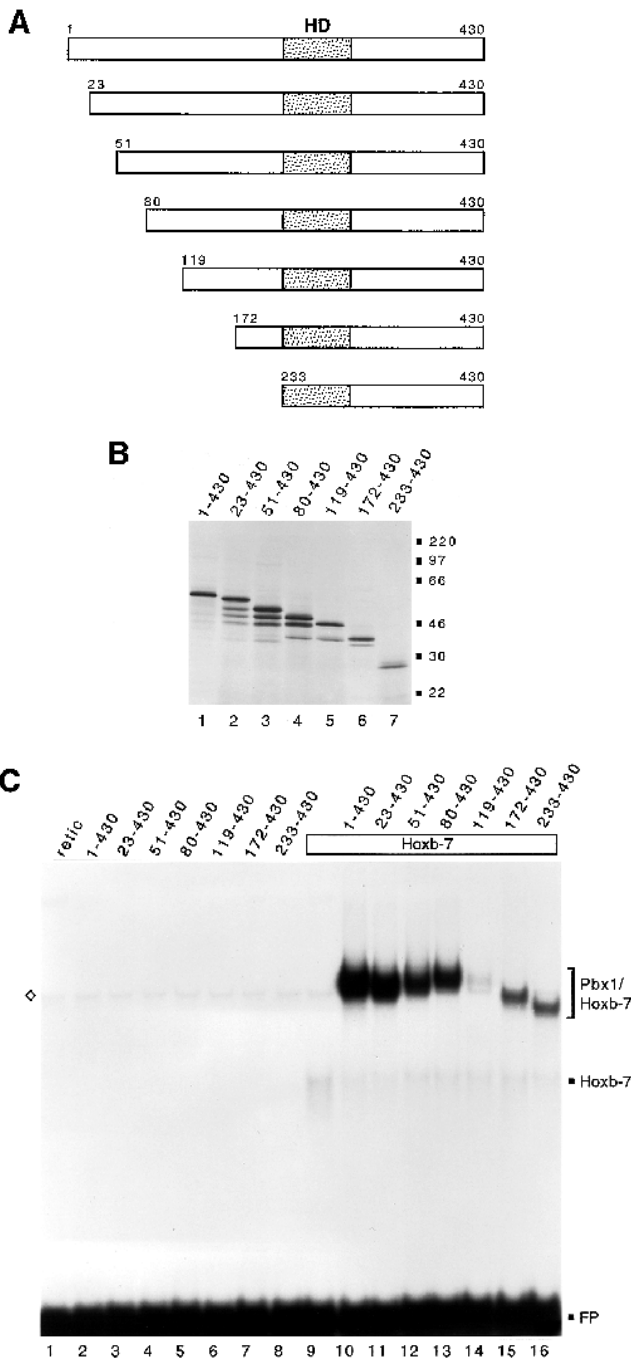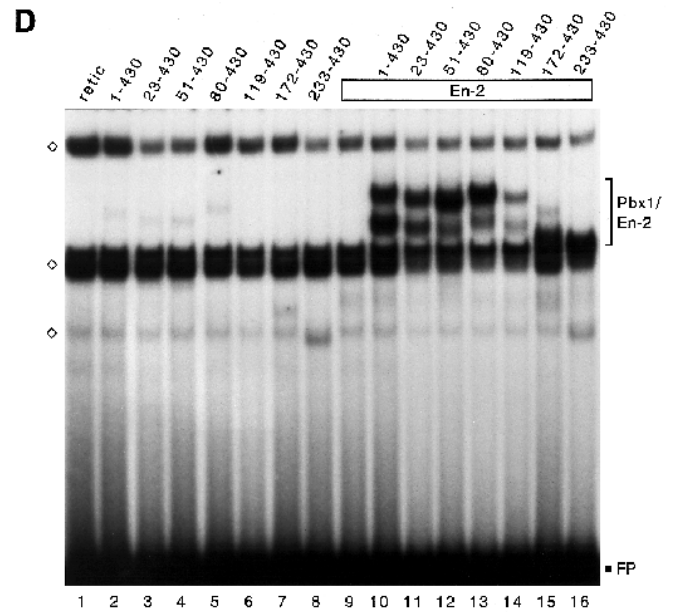

**Fig. 1.** The N-terminal region of Pbx1 is required for optimal cooperative binding with Hox and En-2 proteins. (A) Schematic representation of Pbx1 deletion proteins. Numbers depict amino acid residues. The Pbx1 coding region was truncated using PCR with end-specific primers at the indicated N-terminal positions. The position of the Pbx homeodomain is marked by a dotted box. (B) SDS-PAGE analysis of representative samples from in vitro transcription/translation reactions in the presence of [<sup>35</sup>S]methionine. The number of methionines in the correct products are 14, 12, 12, 10, 8, 8 and 4, respectively. The squares on the right indicate a size marker ( $\times 10^3$  Mr) (C) 2  $\mu$ l of each of the indicated proteins were incubated at room temperature for 30 minutes with probe 5'-GAGATGATTTACTTTAGTC-3' and resulting complexes were analyzed by EMSA. (D) 2  $\mu$ l of the indicated lysates were incubated with probe 5'-GTCAATTAATGATCAATCAATTTTCG-3', and analyzed by EMSA. (C,D) The lanes labeled 'retic' show incubation of the probes with 4  $\mu$ l of the unprogrammed reticulocyte lysate only. Specific complexes are indicated on the right with a dark square and a bracket. FP indicates the free probe and the open diamond on the left the complexes formed by unprogrammed lysate.

secutive truncated coding regions were designed (Fig. 2A). To verify that comparable quantities were produced, representative samples of the in vitro translated proteins were analyzed on SDS-PAGE gels (Fig. 2B, lanes 1-5). EMSA analyses demonstrate that by themselves these proteins barely bind DNA (Fig. 2C, lanes 1-5). Upon addition of Hoxb-7, heterodimeric complexes are formed that bind with similar affinity as compared to wild-type Pbx1, except for the truncation lacking all residues C-terminal of the homeodomain (Fig. 2C, lanes 7-11). Cooperative DNA binding involving En-2 and truncated versions of Pbx1 decreases upon deletion to amino acid 304 (Fig. 2D, lanes 7-10) and is completely lost when all of the residues C-terminal of the homeodomain have been deleted (Fig. 2D, lane 11). These experiments indicate that the Pbx1 C-terminal 121 amino acids are not required for cooperative DNA

binding with either Hoxb-7 or Engrailed, but residues immediately C-terminal of the homeodomain are essential.

**The Pbx structural determinants for cooperative DNA binding with Hoxb-7 and Engrailed-2 are located in the homeodomain and the proximate C-terminal flanking amino acids**

To determine the minimal region of Pbx1 required for cooperative DNA binding with Hox and En-2, we deleted both termini of the Pbx coding region (Fig. 3A). SDS-PAGE of the in vitro translated products showed that the various forms are equally well translated (Fig. 3B, lanes 1-5). When analyzed by EMSA, the truncated proteins do not exhibit DNA binding by themselves (Fig. 3C). However, in the presence of Hoxb-7, heterodimeric complexes are formed with full-length and

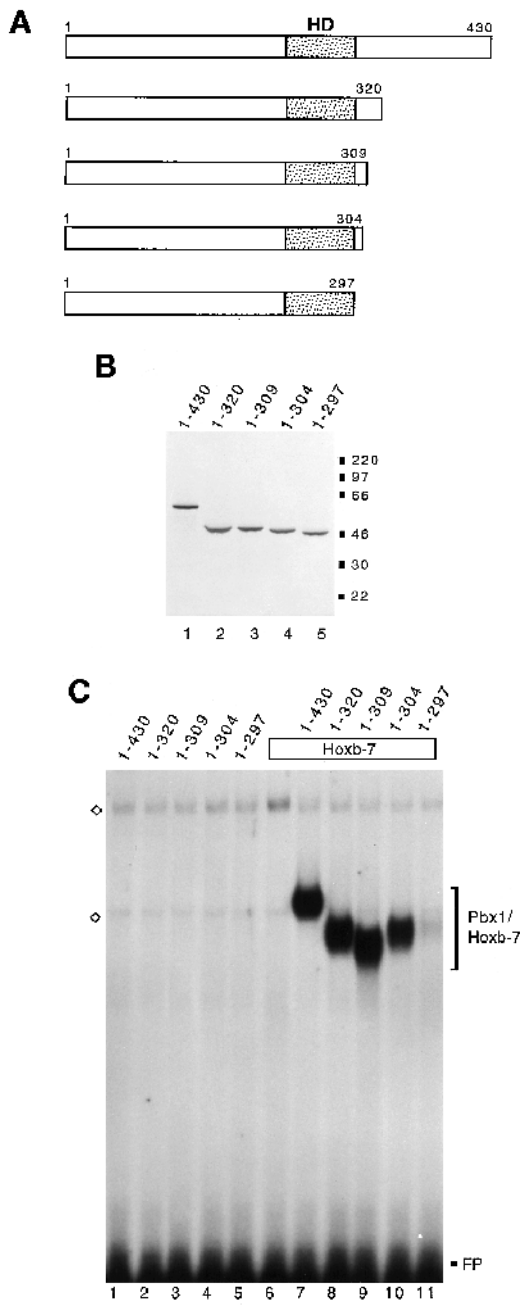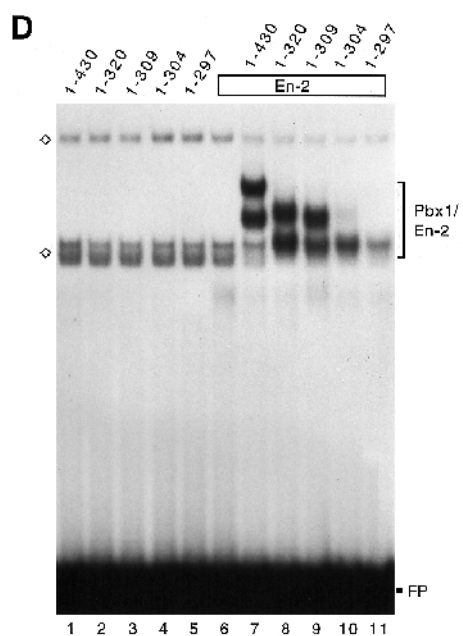

**Fig. 2.** Almost the entire Pbx1 carboxy terminus is dispensable for cooperative binding with Hox and En-2. (A) Schematic representation of the truncated Pbx1 coding regions that were translated in vitro. The homeodomain is indicated by a dotted box. (B) SDS-PAGE analysis of representative [<sup>35</sup>S]methionine-labeled samples of in vitro translation reactions of the indicated coding regions. The amounts of methionines in the products are 14, 11, 11, 11, 11 and 7, respectively. The size marker ( $\times 10^3 M_r$ ) is indicated on the right. (C) EMSA analysis of 2  $\mu$ l of the indicated in vitro translated deletion proteins in the presence or absence of Hoxb-7 lysate. The probe used was 5'-GAGATGATTTATTACTTTAGTC-3'. (D) EMSA analysis of the same deletion proteins with or without En-2 in the presence of probe 5'-GTCAATTAATGATCAATCAATTTCG-3'. (C,D) On the right, specific complexes are indicated with a bracket. FP represents the free probe and the open diamonds on the left indicate the complexes specific for the unprogrammed lysate.

truncated versions of Pbx1 (amino acids 233-309 and 233-304; Fig. 3C, lanes 7, 9, 10). When a portion of the N terminus is present, *i.e.* in deletion protein 105-309, Pbx1/Hoxb-7 cooperativity is almost abolished, again indicating the release of an inhibitory domain upon truncation of the 105 N-terminal residues (Fig. 3C, lane 8). The Pbx1 homeodomain by itself is not sufficient for cooperativity with Hoxb-7 (Fig. 3C, lane 11).

We next analyzed the truncated forms of Pbx1 for their ability to bind as multimeric complexes with En-2, using a probe containing sites that allow Pbx1/En-2 DNA binding complexes. Binding of full-length Pbx1 and a truncated form of Pbx1 (105-309) by themselves to this probe is barely detectable (Fig. 3D, lanes 1 and 2). However, the shorter products bind more efficiently (Fig. 3D, lanes 3-5 and see also Fig. 1D), indicating the presence of a domain preventing intrinsic DNA binding of Pbx1. The various truncated forms of Pbx1 bind as multimers with En-2 in a similar pattern as described above for Hoxb-7 (Fig. 3D, lanes 7, 9-10), except for the Pbx1 homeodomain that is still able to cooperate with En-2 (Fig. 3D, lane 11). Collectively, these data indicate that the Pbx1 homeodomain and a

short C-terminal extension are required for cooperative DNA binding involving Hox proteins. Cooperative binding of Pbx1 with En-2 requires the Pbx1 homeodomain.

### The homeodomain-flanking regions are not sufficient for cooperative DNA binding

The experiments described above indicate that the Pbx1 homeodomain and a C-terminal extension are required for binding to DNA as a heterodimer with Hoxb-7. To establish whether the Pbx1 C- and N-terminal domains flanking the Pbx1 homeodomain allow cooperative DNA binding with Hoxb-7 when fused to a heterologous homeodomain, a chimeric protein was generated. Within the context of full-length Pbx1, the Pbx1 homeodomain was exchanged for the Hoxb-8 homeodomain (Fig. 4A). The proteins were *in vitro* translated and analyzed by SDS-PAGE, showing that the correct products were translated with similar efficiencies (Fig. 4B, lanes 1-3). The hybrid protein was tested for cooperative binding with Hoxb-7 using either an optimal Hoxb-8/Pbx1-binding site or a probe originally shown to bind abd-A/exd heterodimers (S. T. C. Neuteboom and C. M.,

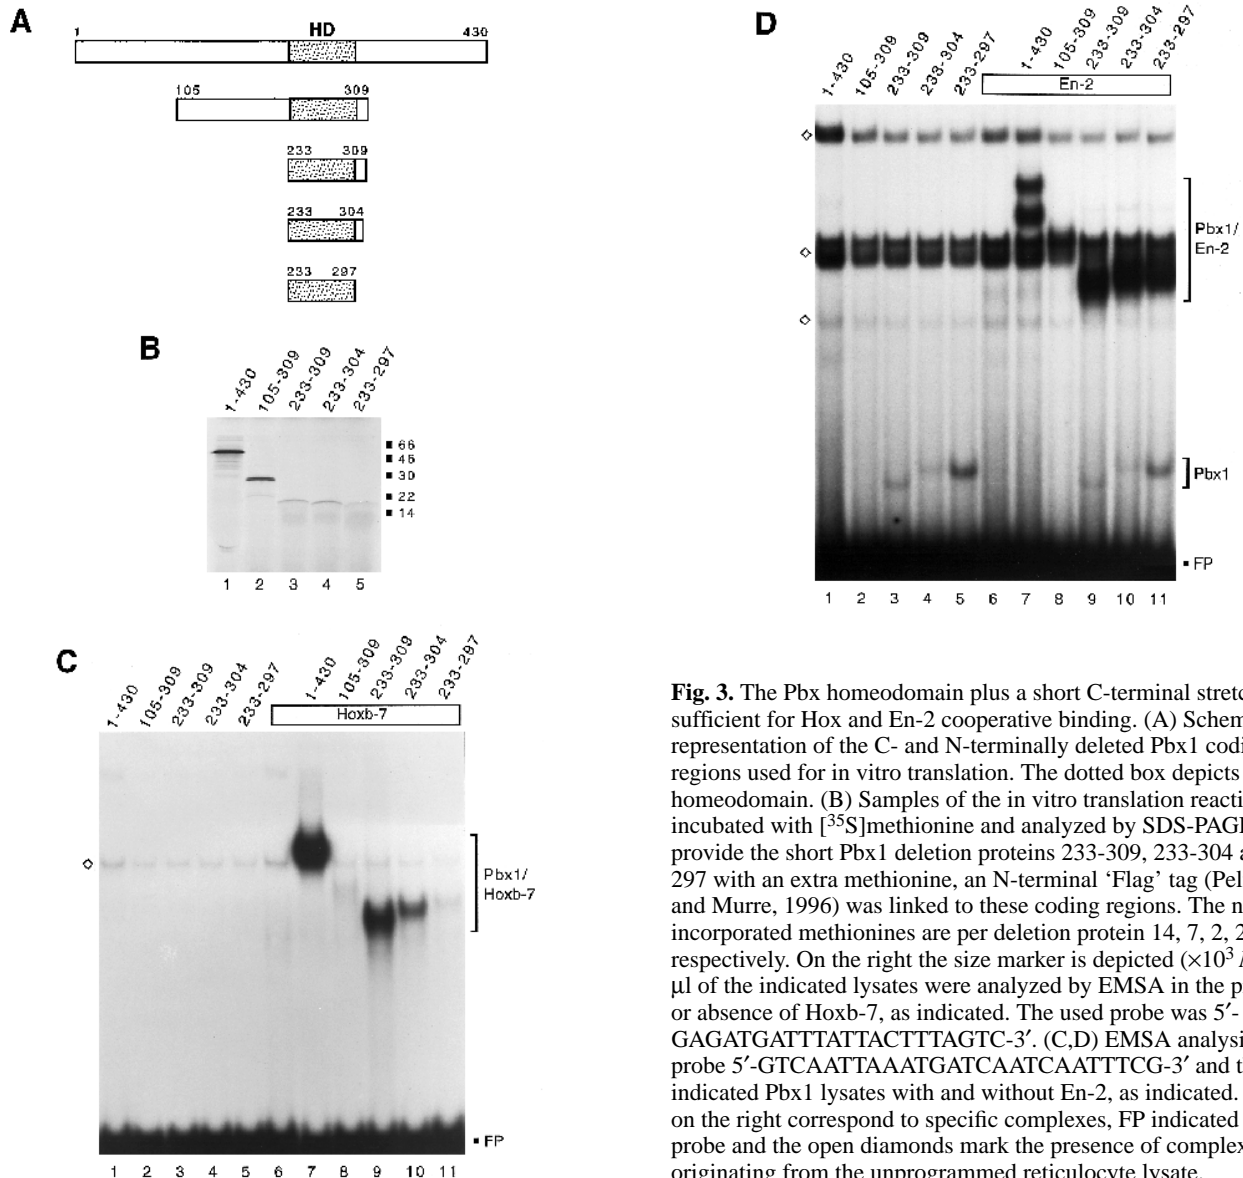

**Fig. 3.** The Pbx homeodomain plus a short C-terminal stretch are sufficient for Hox and En-2 cooperative binding. (A) Schematic representation of the C- and N-terminally deleted Pbx1 coding regions used for *in vitro* translation. The dotted box depicts the Pbx homeodomain. (B) Samples of the *in vitro* translation reactions were incubated with [<sup>35</sup>S]methionine and analyzed by SDS-PAGE. To provide the short Pbx1 deletion proteins 233-309, 233-304 and 233-297 with an extra methionine, an N-terminal 'Flag' tag (Peltenburg and Murre, 1996) was linked to these coding regions. The number of incorporated methionines are per deletion protein 14, 7, 2, 2 and 2, respectively. On the right the size marker is depicted ( $\times 10^3 M_r$ ). (C) 2  $\mu$ l of the indicated lysates were analyzed by EMSA in the presence or absence of Hoxb-7, as indicated. The used probe was 5'-GAGATGATTTACTTTAGTC-3'. (C,D) EMSA analysis with probe 5'-GTCAATTAATGATCAATTCG-3' and the indicated Pbx1 lysates with and without En-2, as indicated. Brackets on the right correspond to specific complexes, FP indicated the free probe and the open diamonds mark the presence of complexes originating from the unprogrammed reticulocyte lysate.

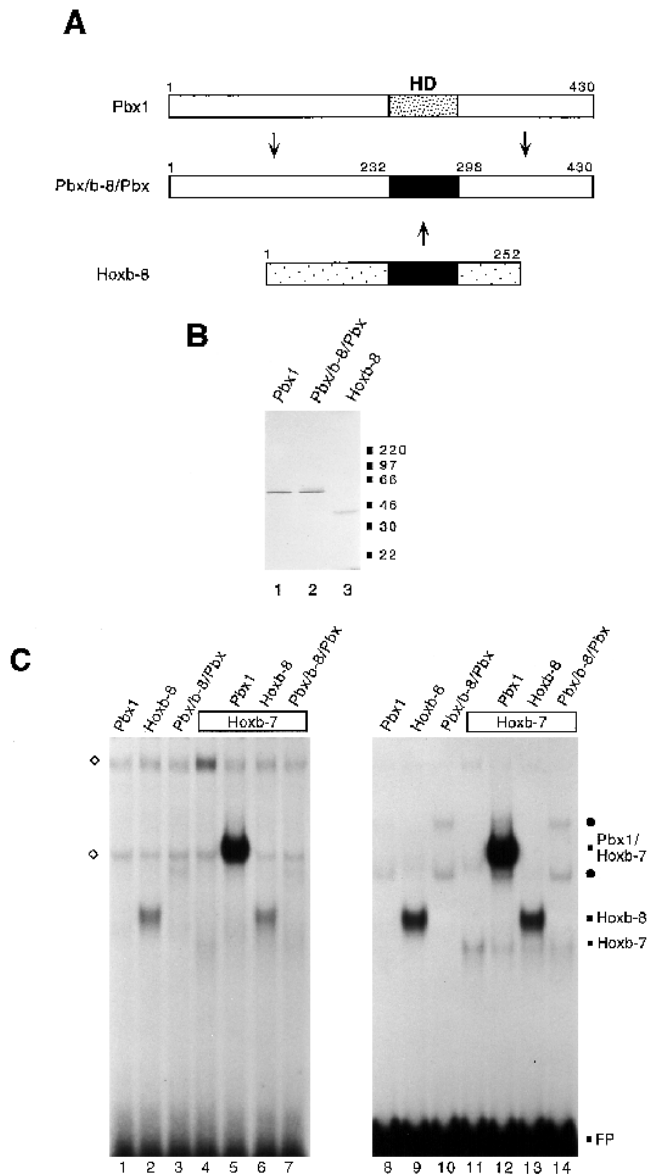

**Fig. 4.** The Pbx homeodomain-flanking sequences are not sufficient to support cooperative binding with Hoxb-7. (A) Schematic drawing of the fusion of the Hoxb-8 homeodomain to the Pbx1 flanking regions. Open boxes indicate Pbx1 flanking sequences, the lightly dotted box corresponds to Hoxb-8 flanking regions, the black box to the Hoxb-8 homeodomain and the densely dotted box indicates the Pbx1 homeodomain. (B) SDS-PAGE analysis of  $^{35}\text{S}$ -labeled samples of the indicated translated constructs. A size marker is positioned on the right ( $\times 10^3 M_r$ ). (C) EMSA analysis of the indicated proteins in the presence or absence of Hoxb-7 lysate. Left panel: incubation with probe 5'-GAGATGATTACTTTAGTC-3', right panel: incubation with probe 5'-GTCAATTAATGCGCATCAATTCG-3'. Specific complexes are marked with a filled square, open diamonds correspond to complexes specific for the unprogrammed lysate, FP indicates the free probe and the filled circles mark DNA binding by the Pbx proteins themselves.

unpublished data and van Dijk et al., 1994). The hybrid Pbx/b-8/Pbx protein binds with higher affinity to both probes as compared to wild-type Pbx1 by itself, but with lower affinity than Hoxb-8 by itself (Fig. 4C, lanes 1-3 and 8-10). Thus, the

Pbx flanking regions reduce the intrinsic DNA-binding activity of Hoxb-8 to these probes. The hybrid protein, however, does not show any cooperative binding to these probes with Hoxb-7 (Fig. 4C, lanes 5-7 and 12-14). These data suggest that the Pbx flanking regions are not sufficient for heterodimeric DNA binding with Hoxb-7, implying an important function for the Pbx homeodomain in cooperative DNA binding.

### Some specific structural determinants involved in $\alpha 1/\alpha 2$ interactions are also required for Pbx/Hox and Pbx/En-2 cooperativity

The data described above confirmed a role for the Pbx1 homeodomain in allowing cooperative DNA binding with Hox and Engrailed proteins. To precisely define residues within the homeodomain, we pursued the following strategies. First, as described above, there are striking similarities between Pbx/Hox cooperative DNA binding and two homeodomain proteins  $\alpha 1$  and  $\alpha 2$ . Recent structural data derived from the crystal structure of an  $\alpha 1/\alpha 2$  heterodimer complexed to DNA have indicated a number of contacts between  $\alpha 2$  and the homeodomain of  $\alpha 1$  (Li et al., 1995). Interactions between these transcription factors are modulated through contacts in the  $\alpha 1$  homeodomain, specifically in the pocket between helices 1 and 2 which is flanked by hydrophobic residues (Li et al., 1995). Similar positions in the Pbx homeodomain are occupied by hydrophobic residues. Two hydrophobic residues in the Pbx1 homeodomain, an isoleucine and a tyrosine, were changed into arginine and lysine residues, designated as HD<sup>15,19</sup> (Fig. 5A). Both residues are commonly used at the same position in a wide variety of homeodomain-containing proteins (Bürglin, 1994) and thus are not expected to change the overall structure of the homeodomain. In addition, within the  $\alpha 1$  homeodomain, one side of this pocket is flanked by a salt bridge between the N-terminal residue of the loop between helix 1 and helix 2 and the N terminus of helix 2. In HD<sup>28,29</sup>, the two glutamates in helix 2 were changed to arginines, both of which are commonly found at the amino terminus of helix 2 (Fig. 5A).

By mutational analysis, it has been shown that residues located in the loop between helix 2 and helix 3 in  $\alpha 1$  are involved in interaction with  $\alpha 2$  (Stark and Johnson, 1994). At those positions, the Pbx1 homeodomain contains identical residues which are rarely present in other homeodomain-containing proteins. To assess whether these residues are required for cooperativity with Pbx1, they were changed into common leucines, designated as mutant HD<sup>38,40</sup>.

Each mutant was efficiently translated in vitro (Fig. 5B, lanes 1, 5 and 6) and tested for their ability to bind DNA as heterodimers with Hoxb-7, Hoxb-8 and Hoxc-6 by EMSA. DNA binding by the Pbx proteins themselves was undetectable (unpublished data). Both mutants HD<sup>15,16</sup> (helix 1) and HD<sup>28,29</sup> (helix 2) are severely affected in their ability to modulate cooperative interactions with each of the Hox proteins (Fig. 5C, lanes 2, 6 and 7). Cooperative DNA binding involving mutant HD<sup>38,40</sup>, located in the loop between helix 2 and helix 3 with the Hox proteins was not affected (Fig. 5, lane 8). Cooperative DNA binding of the mutants in conjunction with En-2 showed an identical pattern (Fig. 5D, lanes 12, 16, 17 and 18). Interestingly, mutant HD<sup>28,29</sup> showed significant intrinsic DNA binding to the En-2/Pbx1 probe, whereas with En-2 cooperative DNA binding is barely detectable (Fig. 5C, lanes 7 and 16). Taken together, these data suggest that there are similarities and clear differences

between  $\alpha 1/\alpha 2$  interaction and Pbx/Hox or Pbx/En-2 cooperativity. In particular, it is striking that specific residues required for the formation of  $\alpha 1/\alpha 2$  heterodimers are similarly required for cooperative DNA binding involving Pbx, Hox and En-2.

### Differential structural requirements for Pbx/Hox and Pbx/Engrailed cooperativity

We also examined whether changes in amino acids within the region immediately N-terminal of helix 1 of the Pbx homeodomain have an impact on cooperativity involving either Hox or En-2. Mutations HD1 and HD6, substituting a rare alanine and arginine for an arginine and threonine, respectively, are changes to common residues found in homeodomain proteins. HD<sup>2</sup> is a nonconservative substitution of an arginine into a glutamine residue. We also introduced two substitutions in helix 3 of the Pbx1 homeodomain. The first residue of helix 3 has not been implicated in base-specific contacts (Bürglin, 1994) and is in the Pbx homeodomain a valine, rarely present at that position in typical homeodomain proteins. We mutated V<sup>42</sup> in Pbx1 into a common glutamate in mutant HD<sup>42</sup> (Fig. 5A). Mutant HD<sup>50</sup> contains a change from an uncommon G<sup>50</sup> to the consensus glutamine residue, known to contact bases in the major groove of the DNA (Bürglin, 1994).

The mutants were transcribed and translated in vitro (Fig. 5B) and analyzed by EMSA for cooperative DNA binding with both Hox and En-2. HD<sup>1</sup>, HD<sup>6</sup>, HD<sup>42</sup> and HD<sup>50</sup> each were able to bind cooperatively to DNA in the presence of Hoxb-7, Hoxb-8 and Hoxc-6 (Fig. 5C, lanes 3, 5, 9 and 10). The same mutants were capable of cooperative DNA binding with En-2 (Fig. 5D, lanes 13, 15, 19 and 20). However, while mutant HD<sup>2</sup> was severely affected in cooperativity with the Hox proteins (Fig. 5C, lanes 4), this mutant did not affect cooperativity with En-2 (Fig. 5D, lane 14). Taken together, these data indicate that Pbx1 DNA binding in concert with the Hox gene products requires different structural determinants as compared to Pbx1/En-2 multimeric complexes.

### The three-amino acid atypical insertion in the Pbx homeodomain is an important structural determinant for cooperative binding in conjunction with both Hox and Engrailed

The group of atypical homeodomain proteins are characterized by the abnormal length of their homeodomains (Bürglin, 1994). Pbx1, Pbx2 and Pbx3 are members of this family, since they contain insertions of three residues in the turn separating helix 1 from helix 2 (Fig. 6A, Bürglin, 1994). It is particularly

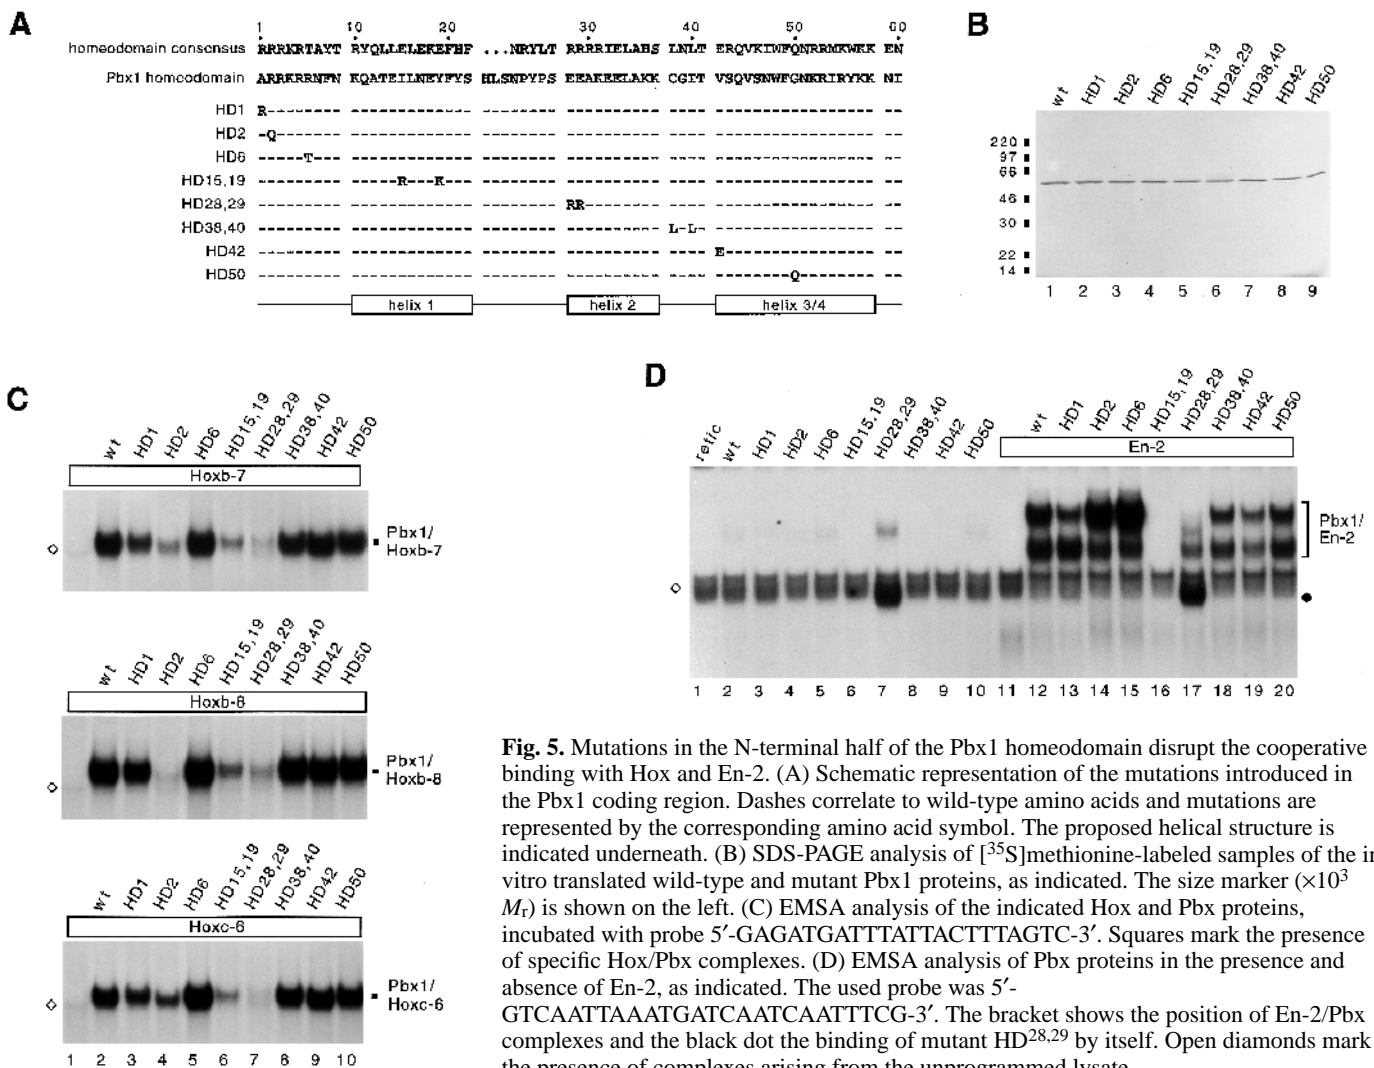

**Fig. 5.** Mutations in the N-terminal half of the Pbx1 homeodomain disrupt the cooperative binding with Hox and En-2. (A) Schematic representation of the mutations introduced in the Pbx1 coding region. Dashes correlate to wild-type amino acids and mutations are represented by the corresponding amino acid symbol. The proposed helical structure is indicated underneath. (B) SDS-PAGE analysis of [<sup>35</sup>S]methionine-labeled samples of the in vitro translated wild-type and mutant Pbx1 proteins, as indicated. The size marker ( $\times 10^3 M_r$ ) is shown on the left. (C) EMSA analysis of the indicated Hox and Pbx proteins, incubated with probe 5'-GAGATGATTTACTTACTTTAGTC-3'. Squares mark the presence of specific Hox/Pbx complexes. (D) EMSA analysis of Pbx proteins in the presence and absence of En-2, as indicated. The used probe was 5'-GTCAATTAATGATCAATCAATTTTCG-3'. The bracket shows the position of En-2/Pbx complexes and the black dot the binding of mutant HD<sup>28,29</sup> by itself. Open diamonds mark the presence of complexes arising from the unprogrammed lysate.







**Table 1. Alignment of the regions spanning helix 1 and helix 2 of atypical homeodomain proteins with a three amino acid insertion**

| Protein               | Helix 1            | Helix 2                   |
|-----------------------|--------------------|---------------------------|
| homeodomain consensus | 10<br>RYQLLELEKEFH | 37<br>...NRYLT RRRRIELAHS |
| Pbx1                  | KQATEILNEYFYS      | HLSNPYPS EEAKEELAKK       |
| Pbx2                  | KQATEVLNEYFYS      | HLSNPYPS EEAKEELAKK       |
| Pbx3                  | KQATEILNEYFYS      | HLSNPYPS EEAKEELAKK       |
| exd                   | KQASEILNEYFYS      | HLSNPYPS EEAKEELARK       |
| ceh-20                | KQATEVLNEYFYG      | HLSNPYPS EEAKEDLARQ       |
| Um bE1                | DLPAYHMRKHFL       | TLDNPYPT QEEKETLVRL       |
| Um bE2                | DLPAYHMRKHFLH      | TLDNPYPT QEEKEGLVRL       |
| Um bE3                | DLPAYHMRKHFLH      | TLENPYPT QEEKEGLVRL       |
| Um bE4                | DLPAYHMRKHFLH      | TLENPYPT QEEKETLVRL       |
| Um bE5                | DLPAYHMRKHFL       | TLDNPYPT QEEKQNLVRL       |
| Um bE6                | DLPAYHMRKHFLH      | TLDSPYPT QEEKETLVRL       |
| Um bE7                | DLPAYHMRKHFL       | TLDSPYPT QEEKEGLVRL       |
| Kn1                   | KEARQQLLSWWDQ      | HYKWPYPS ETQKVALAES       |
| ZMH1                  | GDTTSLKQWQEQE      | HSKWPYPT EDDKAKLVEE       |
| ZMH2                  | GDTASTLKAWWQA      | HSKWPYPT EEDKARLVQE       |
| MAT $\alpha$ 2        | KENVRILESWFAK      | NLENPYLD TKGLENLMKN       |
| Sp MAT1Pi             | KCTKPHLMRWLL       | HYDNPYPS NSEFYDLSAA       |
| Cc A $\beta$ 1-1      | PAYVEPCARWLKD      | NWYNPYPS GEVRTQIARQ       |
| Cc A $\beta$ 4-1      | PAYIEPSCRWLKD      | NWYNPYPS PQVRSSIAKQ       |
| Sc A $\alpha$ Z3      | PPFIGACYEWLLQ      | HLHNPYPS KSEKQIILQL       |
| Sc A $\alpha$ Z4      | PPYIEPCYRWLVN      | HLDNPYPT KAIKEELLDDQ      |

References for sequences Pbx1, Pbx2 and Pbx3 (Kamps et al., 1990; Nourse et al., 1990; Monica et al., 1991), *D. melanogaster* exd (Flegel et al., 1993), *C. elegans* ceh-20 (Bürglin and Ruvkun, 1992), *Ustilago maydis* bE (Kronstad and Leong, 1990; Schulz et al., 1990), Kn1, ZMH1 and ZMH2 (Vollbrecht et al., 1991), *S. cerevisiae* MAT $\alpha$ 2 (Astell et al., 1981), *Schizosaccharomyces pombe* MAT1Pi (Kelly et al., 1988), *Coprinus cinereus* A $\beta$ 1-1 and A $\beta$ 4-1 (Kües et al., 1992; Bürglin, 1994), *Schizophyllum commune* A $\alpha$ Z3 and A $\alpha$ Z4 (Stankis et al., 1992; Bürglin, 1994).

## DISCUSSION

A large variety of homeodomain-containing proteins bind to DNA in a cooperative manner. Among the best characterized examples are two proteins that control cell fate in *Saccharomyces cerevisiae*, MAT $\alpha$ 1 and MAT $\alpha$ 2 (Johnson, 1992). Recently, a new family of proteins has been identified that include *Drosophila* gene product extradenticle, and Pbx1, Pbx2 and Pbx3 (Monica et al., 1991). The Pbx family of proteins allows other classes of homeodomain proteins to bind to DNA with higher affinity and specificity (Chan et al., 1994; van Dijk and Murre, 1994; Chang et al., 1995; Lu et al., 1995; Phelan et al., 1995; van Dijk et al., 1995). Among these other classes belong the Hox proteins, members of the Engrailed family and orphan homeodomain proteins, for example STF-1 (Peers et al., 1995). The domains that are required for Hox and Engrailed cooperativity have been well defined (Chang et al., 1995; Knoepfler and Kamps, 1995; Neuteboom et al., 1995; Phelan et al., 1995; Peltenburg and Murre, 1996). They involve two motifs: the hexapeptide in Hox proteins and the EH2 domain in Engrailed. These motifs contain a number of conserved residues and share a highly conserved tryptophan residue. One question that arises is whether the Hox and Engrailed proteins require identical structural determinants for cooperativity. The EH2 domain is quite divergent from the hexapeptide and it is conceivable that the EH2 domain interacts

with different residues located in the Pbx protein as compared to the hexapeptide. In previous studies, we showed that synthetic peptides containing either the Hox or Engrailed Pbx interaction motifs can destabilize both Hox/Pbx and Engrailed/Pbx multimeric complexes (Peltenburg and Murre, 1996). However, it was also clear from those experiments that peptides could destabilize cooperativity of homologous proteins more efficiently than heterologous proteins. Thus, while there are clearly overlapping residues that allow cooperativity to occur between Pbx and either Hox or Engrailed, there seemed to be also clear differences. We now have extended these studies. The experiments described above indicate that indeed certain residues present in the Pbx homeodomain are required for cooperativity with both Hox and Engrailed, whereas others are required only for Hox or En-2 cooperativity. For example, within the N-terminal portion of the Pbx homeodomain, we identified a residue that is required for cooperative DNA binding involving Hoxb-7, Hoxb-8 and, to a lesser extent, Hoxc-6, but not for cooperative DNA binding involving En-2. Vice versa, a specific amino acid substitution between helix 1 and helix 2 of the Pbx homeodomain abolished cooperativity involving Engrailed-2 but did not reduce cooperativity with either Hoxb-7, Hoxb-8 or Hoxc-6. Thus, while a number of structural determinants are required for cooperativity involving both Hox and Engrailed, others are clearly more specific.

Previous studies have indicated that there are many similarities between the mechanism of cooperative DNA binding involving  $\alpha$ 1 and  $\alpha$ 2 and the exd/Pbx members interacting with the Hox proteins (Johnson, 1992; van Dijk and Murre, 1994). Here we show that residues in the  $\alpha$ 1 homeodomain that mediate interaction with  $\alpha$ 2 are also required for cooperative DNA binding involving Pbx and Hox gene products. However, we note that there are also significant differences. For example, specific residues in the  $\alpha$ 1 homeodomain located in the turn separating helix 2 from helix 3 are required for cooperativity in conjunction with  $\alpha$ 2 (Stark and Johnson, 1994). By analogy, we have mutated similar residues in Pbx1, but did not detect significant reductions in cooperative DNA binding involving either Hox or Engrailed.

There are also strong similarities between the Pbx/Hox interaction and two classes of homeodomain proteins controlling cell determination in three different fungi, *Ustilago maydis*, *Coprinus cinereus* and *Schizophyllum commune*. For all of these fungi, the fusion of two haplotypes brings together two homeodomain proteins encoded by two different gene families, the bE and bW genes (Banuett, 1992). Both the bE and bW loci encode homeodomain proteins (Gillissen et al., 1992). Although more complicated, there are similarities between the bE and bW members, and  $\alpha$ 1 and  $\alpha$ 2. Both systems bring together two homeodomain proteins that induce the cell to differentiate. However, while in *S. cerevisiae* only one combination of homeodomain proteins occurs, the number of bE and bW proteins is estimated to be at least 25, which in principle can result in at least 625 combinations of homeodomain proteins (Banuett, 1992). Interestingly, the bE homeodomains, like the members of the Pbx family, belong to the group of atypical homeodomain proteins (Bürglin, 1994). Many atypical homeodomain proteins contain three additional residues in the turn between helix 1 and helix 2 (Table 1). We demonstrate here that deletion of these three residues abolishes cooperativity with both Hox and Engrailed, but replacement of three Pbx residues in the loop

between helix 1 and helix 2 with amino acids derived from bE allows Pbx/Hox but does not allow Pbx/Engrailed cooperativity to occur at wild-type levels. While the molecular mechanism of how bE and bW proteins induce differentiation in *U. maydis* has not yet been resolved, it may very well be that the interactions involving bE and bW proteins are similar, as described here for Pbx/Hox and Pbx/Engrailed combinations.

We would like to thank Drs Boncinelli, Saskia Neuteboom and Johan van Es for the generous gift of several plasmids. This work was sponsored by the National Institutes of Health, the Council for Tobacco Research and the Edward Mallinckrodt Jr. Foundation. L. T. C. P. was supported by a fellowship of the Dutch Cancer Society (KWF).

## REFERENCES

- Astell, C. R., Ahlstrom-Jonasson, L., Smith, M., Tatchell, K., Nasmyth, K. A. and Hall, B. D. (1981). The sequences of the DNAs coding for the mating-type loci of *Saccharomyces cerevisiae*. *Cell* **27**, 15-23.
- Banuett, F. (1992). *Ustilago maydis*, the delightful blight. *Trends Genet.* **8**, 174-180.
- Bürglin, T. R. (1994). A comprehensive classification of homeobox genes. In *Guidebook to the Homeobox Genes* (ed. D. Duboule). pp. 27-71. Oxford UK: Oxford University Press.
- Bürglin, T. R. and Ruvkun, G. (1992). New motif in Pbx genes. *Nature Genet.* **1**, 319-320.
- Chan, S.-K., Jaffe, L., Capovilla, M., Botas, J. and Mann, R. S. (1994). The DNA binding specificity of ultrabithorax is modulated by cooperative interactions with extradenticle, another homeodomain protein. *Cell* **78**, 603-615.
- Chang, C.-P., Shen, W.-F., Rozenfeld, S., Lawrence, H. J., Largman, C. and Cleary, M. L. (1995). Pbx proteins display hexapeptide-dependent cooperative DNA binding with a subset of Hox proteins. *Genes Dev.* **9**, 663-674.
- Duboule, D. and Dollé, P. (1989). The structural and functional organization of the murine HOX gene family resembles that of *Drosophila* homeotic genes. *EMBO J.* **8**, 1497-1505.
- Flegel, W. A., Singson, A. W., Margolis, J. S., Bang, A. G., Posakony, J. W. and Murre, C. (1993). Dpbx, a new homeobox gene closely related to the human proto-oncogene pbx1: molecular structure and developmental expression. *Mech. Dev.* **41**, 155-161.
- Gillissen, B., Bergemann, J., Sandmann, C., Schroeder, B., Bolker, M. and Kahmann, R. (1992). A two-component regulatory system for self/non-self recognition in *Ustilago maydis*. *Cell* **68**, 647-657.
- Goutte, C. and Johnson, A. D. (1993). Yeast  $\alpha 1$  and  $\alpha 2$  homeodomain proteins form a DNA-binding activity with properties distinct from those of either protein. *J. Mol. Biol.* **233**, 359-371.
- Johnson, A. (1992). A combinatorial regulatory circuit in budding yeast. In *Transcriptional Regulation* (ed. S. L. McKnight and K. R. Yamamoto). pp. 975-1006. Cold Spring Harbor: Cold Spring Harbor Laboratory Press.
- Johnson, F. B., Parker, E. and Krasnow, M. A. (1995). extradenticle protein is a selective cofactor for the *Drosophila* homeotics: role of the homeodomain and YPWM amino acid motif in the interaction. *Proc. Natl. Acad. Sci. USA* **92**, 739-743.
- Kamps, M. P., Murre, C., Sun, X.-H. and Baltimore, D. (1990). A new homeobox gene contributes the DNA binding domain of the t(1;19) translocation protein in pre-B ALL. *Cell* **60**, 547-555.
- Kelly, M., Burke, J., Smith, M., Klar, A. and Beach, D. (1988). Four mating-type genes control sexual differentiation in the fission yeast. *EMBO J.* **7**, 1537-1547.
- Knoepfler, P. S. and Kamps, M. P. (1995). The pentapeptide motif of Hox proteins is required for cooperative DNA binding with Pbx1, physically contacts Pbx1, and enhances DNA binding by Pbx1. *Mol. Cell. Biol.* **15**, 5811-5819.
- Kronstad, J. W. and Leong, S. A. (1990). The b mating-type locus of *Ustilago maydis* contains variable and constant regions. *Genes Dev.* **4**, 1384-1395.
- Krumlauf, R. (1994). Hox genes in vertebrate development. *Cell* **78**, 191-201.
- Kües, U., Richardson, W. V. J., Tyman, A. M., Mutasa, E. S., Göttgens, B., Gaubatz, S., Gregoriades, A. and Casselton, L. A. (1992). The combination of dissimilar alleles of the  $\alpha A$  and  $\alpha B$  gene complexes, whose proteins contain homeo domain motifs, determines sexual development in the mushroom *Coprinus cinereus*. *Genes Dev.* **6**, 568-577.
- Laughon, A. and Scott, M. (1984). Sequence of a *Drosophila* segmentation gene: protein structure homology with DNA binding proteins. *Nature* **310**, 25-31.
- Lawrence, P. A. and Morata, G. (1994). Homeobox genes: their function in *Drosophila* segmentation and pattern formation. *Cell* **78**, 181-189.
- Li, T., Stark, M. R., Johnson, A. D. and Wolberger, C. (1995). Crystal structure of the MATA1/MAT $\alpha 2$  homeodomain heterodimer bound to DNA. *Science* **270**, 262-269.
- Lu, Q. and Kamps, M. (1996). Structural determinants within Pbx1 that mediate cooperative DNA binding with pentapeptide-containing Hox proteins: proposal for a model of a Pbx1-Hox-DNA complex. *Mol. Cell. Biol.* **16**, 1632-1640.
- Lu, Q., Knoepfler, P. S., Scheele, J., Wright, D. D. and Kamps, M. P. (1995). Both Pbx1 and E2A-Pbx1 bind the DNA motif ATCAATCAA cooperatively with the products of multiple murine Hox genes, some of which are oncogenes themselves. *Mol. Cell. Biol.* **15**, 3786-3795.
- McGinnis, W., Levine, M., Hafen, E., Kuroiwa, A. and Gehring, W. J. (1984). A conserved DNA sequence found in homeotic genes of the *Drosophila* Antennapedia and bithorax complexes. *Nature* **308**, 428-433.
- Monica, K., Galili, N., Nourse, J., Saltman, D. and Cleary, M. L. (1991). PBX2 and PBX3, new homeobox genes with extensive homology to the human proto-oncogene PBX1. *Mol. Cell. Biol.* **11**, 6149-6157.
- Neuteboom, S. T. C., Peltenburg, L. T. C., van Dijk, M. and Murre, C. (1995). The hexapeptide LFPWMR in Hoxb-8 is required for cooperative DNA binding with Pbx1 and Pbx2 proteins. *Proc. Natl. Acad. Sci. USA* **92**, 9166-9170.
- Nourse, J., Mellentin, J. D., Galili, N., Wilkinson, J., Stanbridge, E., Smith, S. D. and Cleary, M. L. (1990). Chromosomal translocation t(1;19) results in synthesis of a homeobox fusion mRNA that codes for a potential chimeric transcription factor. *Cell* **60**, 535-45.
- Peers, B., Sharma, S., Johnson, T., Kamps, M. P. and Montminy, M. (1995). The pancreatic islet factor STF-1 binds cooperatively with Pbx to a regulatory element in the somatostatin promoter: importance of the FPWMK motif and of the homeodomain. *Mol. Cell. Biol.* **15**, 7091-7097.
- Peifer, M. and Wieschaus, E. (1990). Mutations in the *Drosophila* gene extradenticle affect the way specific homeo domain proteins regulate segmental identity. *Genes Dev.* **4**, 1209-1223.
- Peltenburg, L. T. C. and Murre, C. (1996). Engrailed and Hox homeodomain proteins contain a related Pbx interaction motif that recognizes a common structure present in Pbx. *EMBO J.* **15**, 3385-3393.
- Phelan, M. L., Rambaldi, I. and Featherstone, M. S. (1995). Cooperative interactions between Hox and Pbx proteins mediated by a conserved peptide motif. *Mol. Cell. Biol.* **15**, 3989-3997.
- Rauskolb, C., Peifer, M. and Wieschaus, E. (1993). Extradenticle, a regulator of homeotic gene activity, is a homolog of the homeobox-containing human proto-oncogene pbx1. *Cell* **74**, 1101-1112.
- Schulz, B., Banuett, F., Dahl, M., Schlesinger, R., Schafer, W., Martin, T., Herskowitz, I. and Kahmann, R. (1990). The b alleles of *U. maydis*, whose combinations program pathogenic development, code for polypeptides containing a homeodomain-related motif. *Cell* **60**, 295-306.
- Stankis, M. M., Specht, C. A., Yang, H. L., Giasson, L., Ullrich, R. C. and Novotny, C. P. (1992). The  $\alpha A$  mating locus of *Schizophyllum commune* encodes two dissimilar multiallelic homeodomain proteins. *Proc. Natl. Acad. Sci. USA* **89**, 7169-7173.
- Stark, M. R. and Johnson, A. D. (1994). Interaction between two homeodomain proteins is specified by a short C-terminal tail. *Nature* **371**, 429-432.
- van Dijk, M. A. and Murre, C. (1994). extradenticle raises the DNA binding specificity of homeotic selector gene products. *Cell* **78**, 617-624.
- van Dijk, M. A., Peltenburg, L. T. C. and Murre, C. (1995). Hox gene products modulate the DNA binding activity of Pbx1 and Pbx2. *Mech. Dev.* **52**, 99-108.
- Vershon, A. and Johnson, A. (1993). A short, disordered protein region mediates interactions between the homeodomain of the yeast  $\alpha 2$  protein and the mcm1 protein. *Cell* **72**, 105-112.
- Vollbrecht, E., Veit, B., Sinha, N. and Hake, S. (1991). The developmental gene Knotted-1 is a member of a maize homeobox gene family. *Nature* **350**, 241-243.
- Wilkinson, D. G., Bhatt, S., Cook, M., Boncinelli, E. and Krumlauf, R. (1989). Segmental expression of Hox-2 homeodomain-containing genes in the developing mouse hindbrain. *Nature* **341**, 405-409.
